# Supplementary material
Source: PubMed Central journal article supplement (PMC5291044)
Supplement: supp_pp.16.01642_PP2016-01642DR1_Supplemental_Material.pdf [file supp_pp.16.01642_PP2016-01642DR1_Supplemental_Material.pdf]

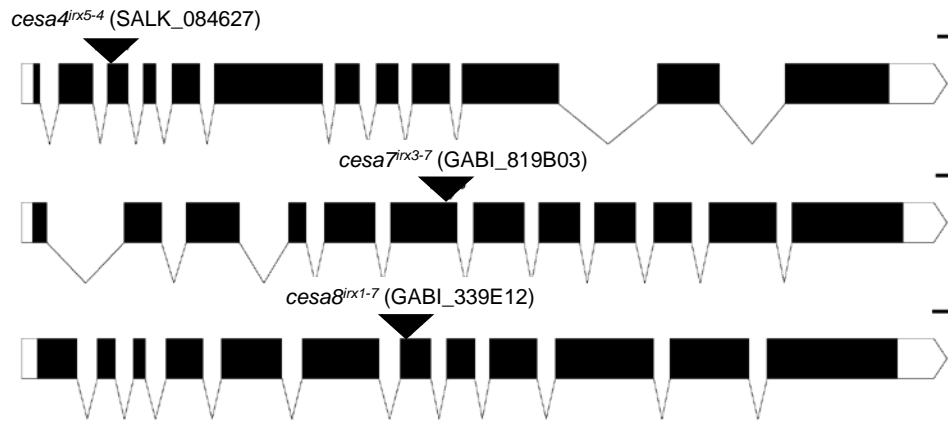

**Figure S1.** Exon/intron structure of Arabidopsis secondary cell wall CESA genes. Exons are shown as boxes (white boxes for UTRs and black boxes for CDS regions) while the introns are shown as lines. Positions of the T-DNA insertion in the mutants used in the study are indicated by arrowhead.

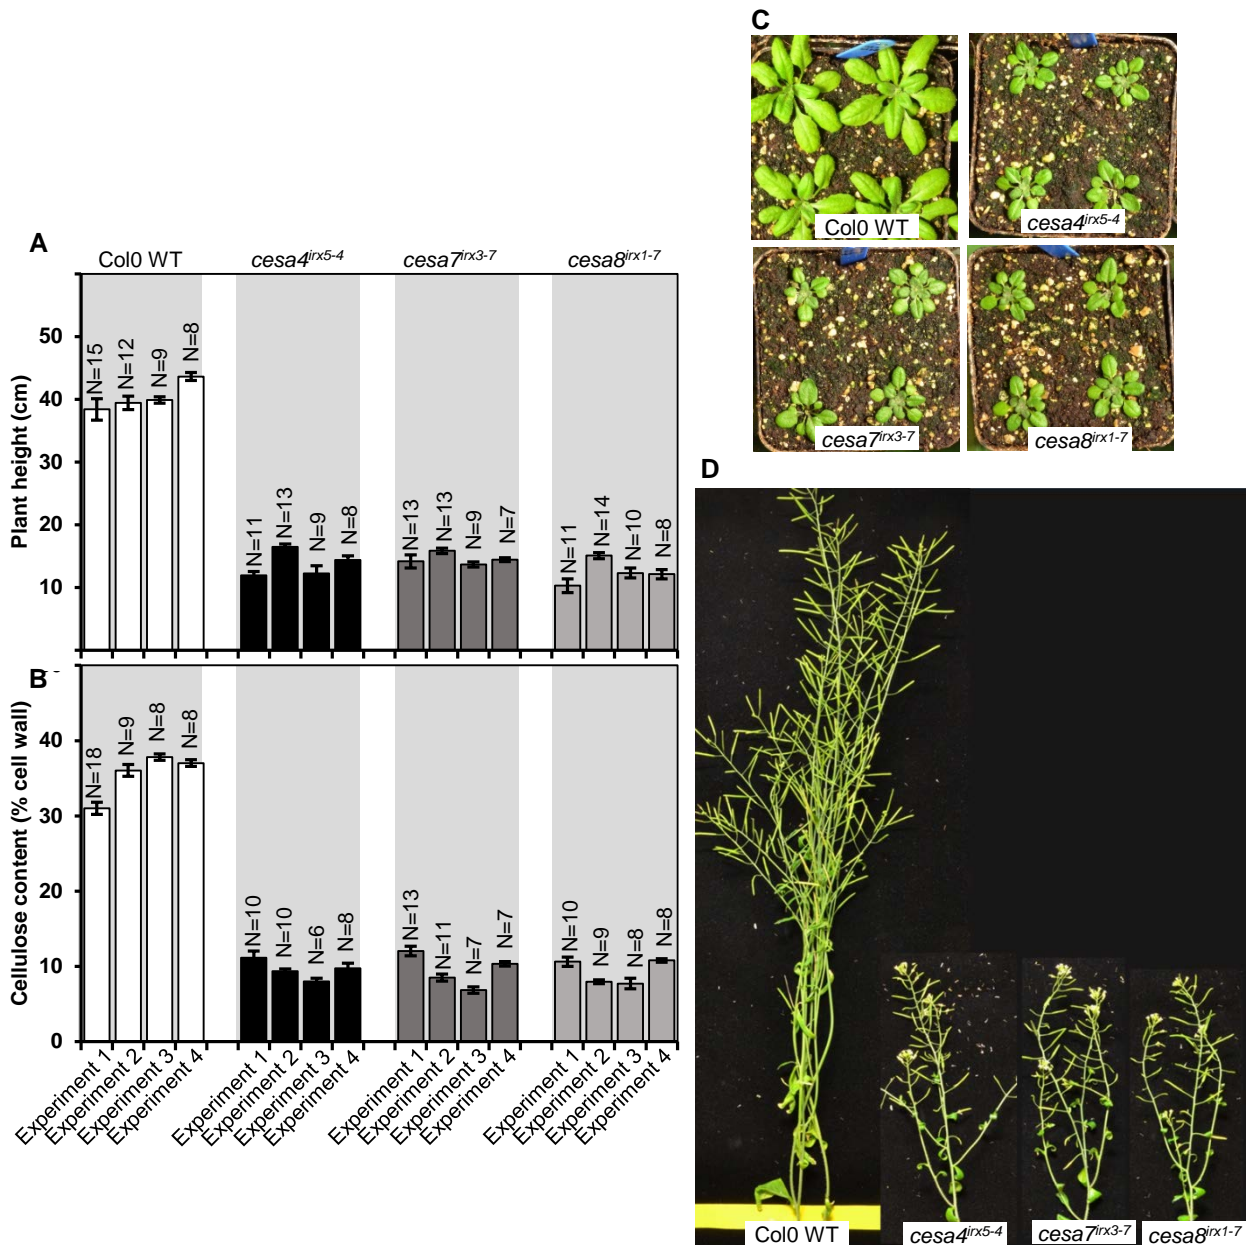

**Figure S2.** Phenotypes of the *cesa* mutants and wild type control.

- A. Plant height
- B. Cellulose content
- C. Rosette appearance
- D. Inflorescence stem.

Error bars shown in (A) and (B), are SEM. Rosette photos (C) were taken when the plants were 21 days old while the photos of primary inflorescence stem severed at rosette level (D) were taken at 7 week stage.

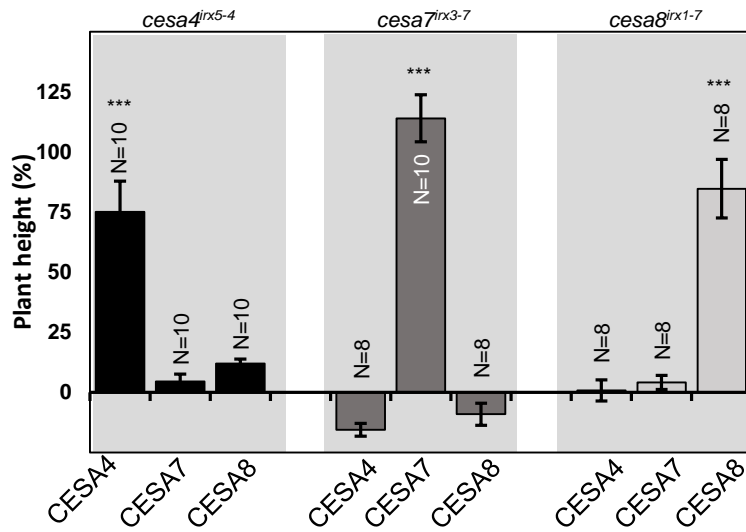

**Figure S3.** Height of different *cesa* mutant plants transformed with WT CESA genes. Error bars are SEM. Significance levels from univariate ANOVA between the genotype and the mutant background are shown; \*\*\* Significant at 0.001.

| Promoter | Gene  | Mutant                       | Plant height (%) |     |     |     |     |     |     |     |    |    | Cellulose content (%) |     |     |    |     |    |    |    |    |     |
|----------|-------|------------------------------|------------------|-----|-----|-----|-----|-----|-----|-----|----|----|-----------------------|-----|-----|----|-----|----|----|----|----|-----|
| pCESA7   | CESA4 | <i>cesa4<sup>ix5-4</sup></i> | 179              | 121 | 112 | 108 | 94  | 90  | 72  | 68  | 45 | 0  | 108                   | 35  | 27  | 16 | 7   | NA | 91 | 11 | 2  | 61  |
|          | CESA7 | <i>cesa7<sup>ix3-7</sup></i> | 208              | 178 | 149 | 149 | 139 | 139 | 129 | 104 | 94 | 89 | NA                    | 118 | 110 | 89 | 145 | 95 | 82 | 97 | 84 | 108 |
|          | CESA8 | <i>cesa8<sup>ix1-7</sup></i> | 182              | 174 | 103 | 99  | 95  | 95  | 66  | 61  | 61 | 57 | 82                    | 128 | 81  | 57 | 50  | 78 | 17 | 57 | 61 | 52  |
| pCESA4   | CESA4 | <i>cesa4<sup>ix5-4</sup></i> | 106              | 96  | 96  | 72  | 69  | 54  | 19  |     |    |    | 98                    | 55  | 85  | 92 | 57  | 84 | 78 |    |    |     |
|          | CESA8 | <i>cesa8<sup>ix1-7</sup></i> | 104              | 82  | 75  | 71  | 71  | 64  | 53  | 28  |    |    | 81                    | 64  | 57  | 54 | 54  | 57 | 49 | 58 |    |     |
| pCESA8   | CESA4 | <i>cesa4<sup>ix5-4</sup></i> | 93               | 93  | 43  | 21  |     |     |     |     |    |    | 51                    | 65  | 59  | 28 |     |    |    |    |    |     |
|          | CESA8 | <i>cesa8<sup>ix1-7</sup></i> | 88               | 81  | 70  | 70  | 63  | 60  | 35  |     |    |    | 96                    | 82  | 81  | 89 | 54  | 72 | 53 |    |    |     |

**Figure S4.** Complementation of secondary cell wall *cesa* mutants using different promoters. CESA4 and 8 were expressed under control of all three SCW CESA promoters. Plant height (%) and cellulose content (%) data is shown for up to 10 independent lines. Plant height (%) = (Plant height of the line – plant height of the background mutant)/(Plant height of Col0 WT– plant height of the background mutant) \*100. Data is colour coded and signifies the % complementation: dark green: >60%, green: 40-60%, light green: 12.5-40%, white: <12.5%.

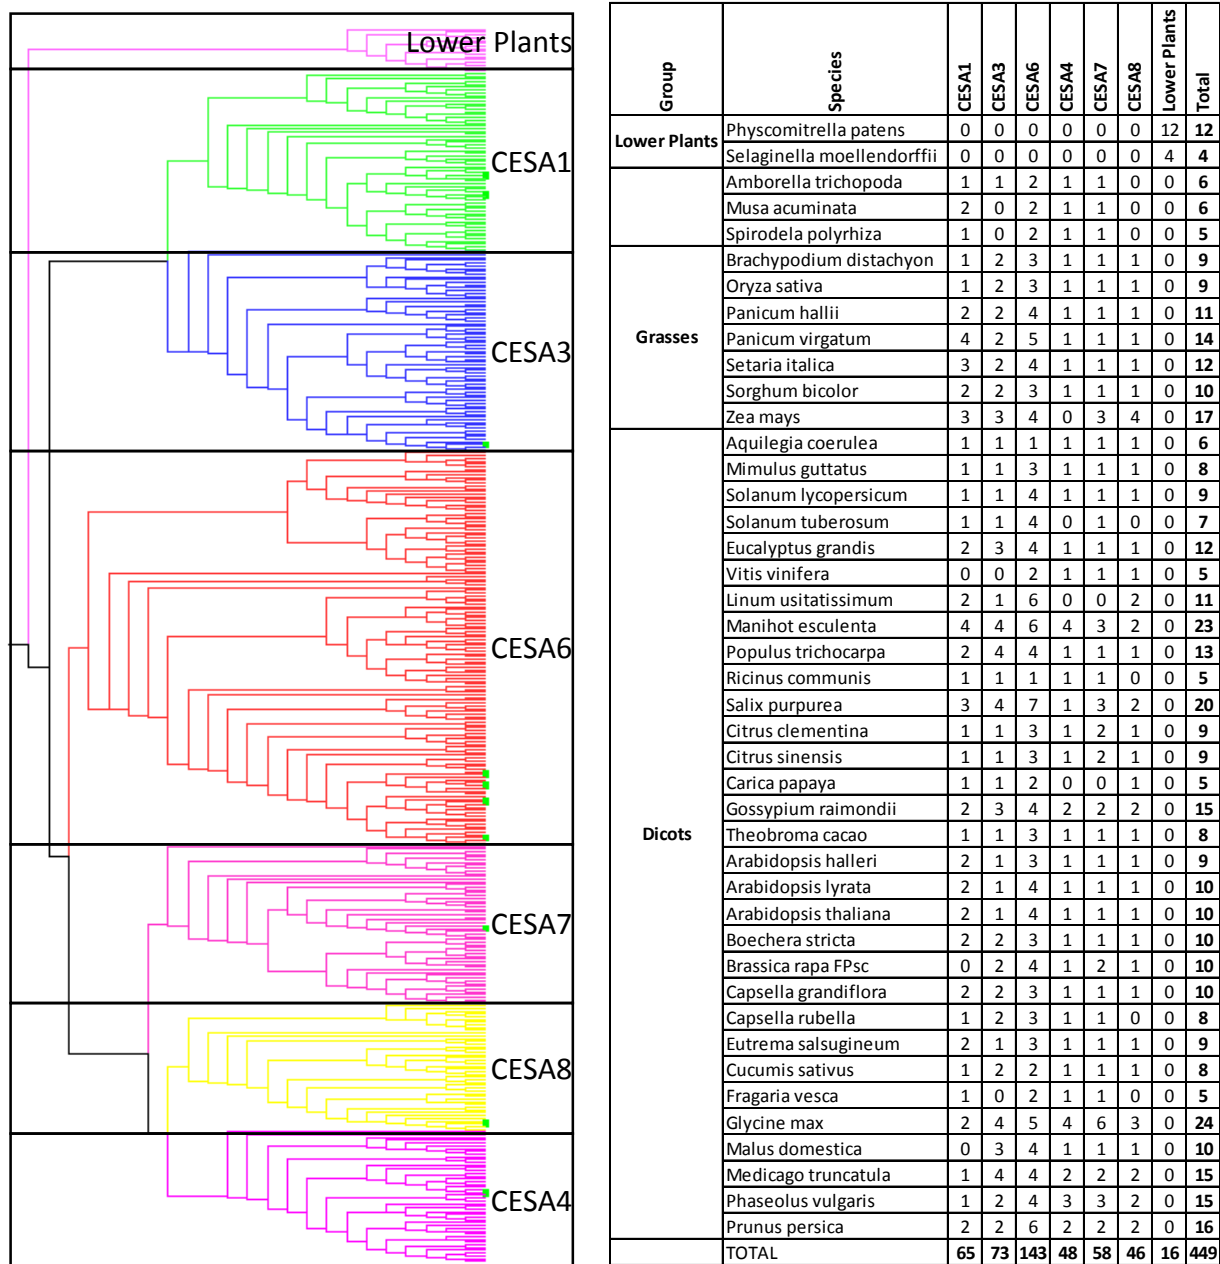

**Figure S5.** Classification of CESA proteins into 6 classes.

The trees is based upon 449 sequences from Phytozome that have been manually curated. The clades were named based on the *Arabidopsis* members which are indicated with green dots in the tree above. The table on the right lists the number of proteins in each CESA class for all the species used in the analysis.

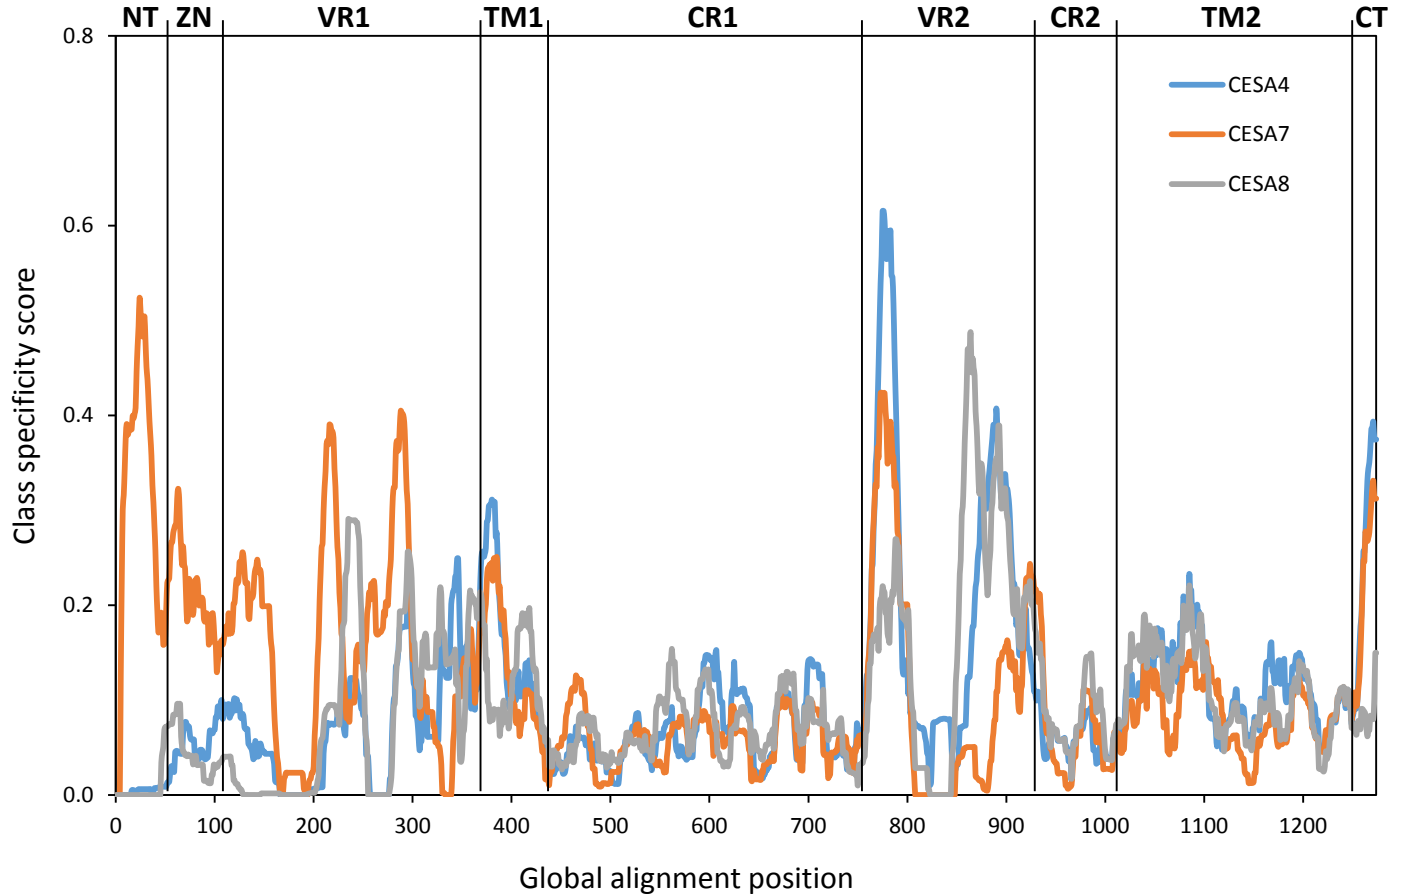

**Figure S6.** Analysis of CESA protein class specificity.

A global alignment of 449 CESA proteins from 43 species was produced as shown in Figure S5. Class specificity scores were calculated at each amino acid position in the global alignment exactly as described in Carroll and Specht (2011). The scores for the 3 SCW CESA classes, CESA4, 7 and 8 were plotted. The curves were smoothed by taking average scores for a sliding window of 10 amino acids.

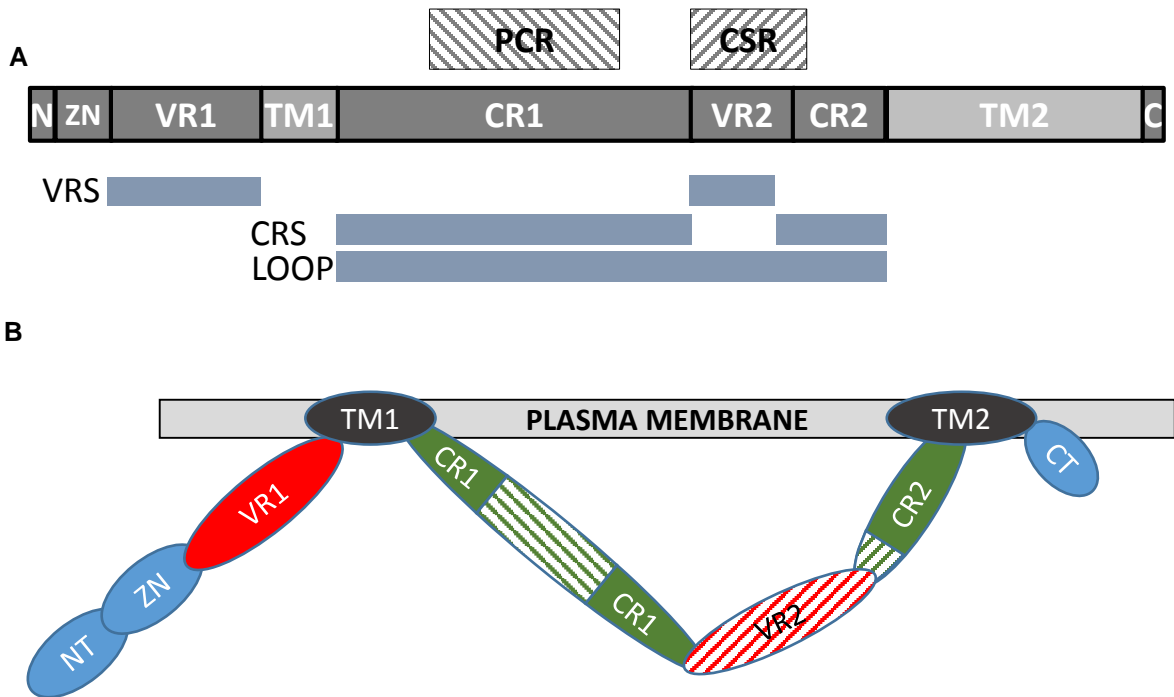

**Figure S7.** Schematic representation of CESA proteins showing the location of the regions used in this study.

- A. Linear representation of a CESA proteins with the 9 regions used in this study shown as boxes with grey fill and black lines. The name of each region is indicated inside each box. The length of each box is proportional to actual region size in amino acids. Position of the PCR and CSR regions described in Veragara and Carpita (2001) is shown above it. A linear representation of the regions involved in the multi-region swap experiments- VRS, CRS and LOOP, are indicated below.
- B. A cartoon representation of the 9 regions and their predicted topology.

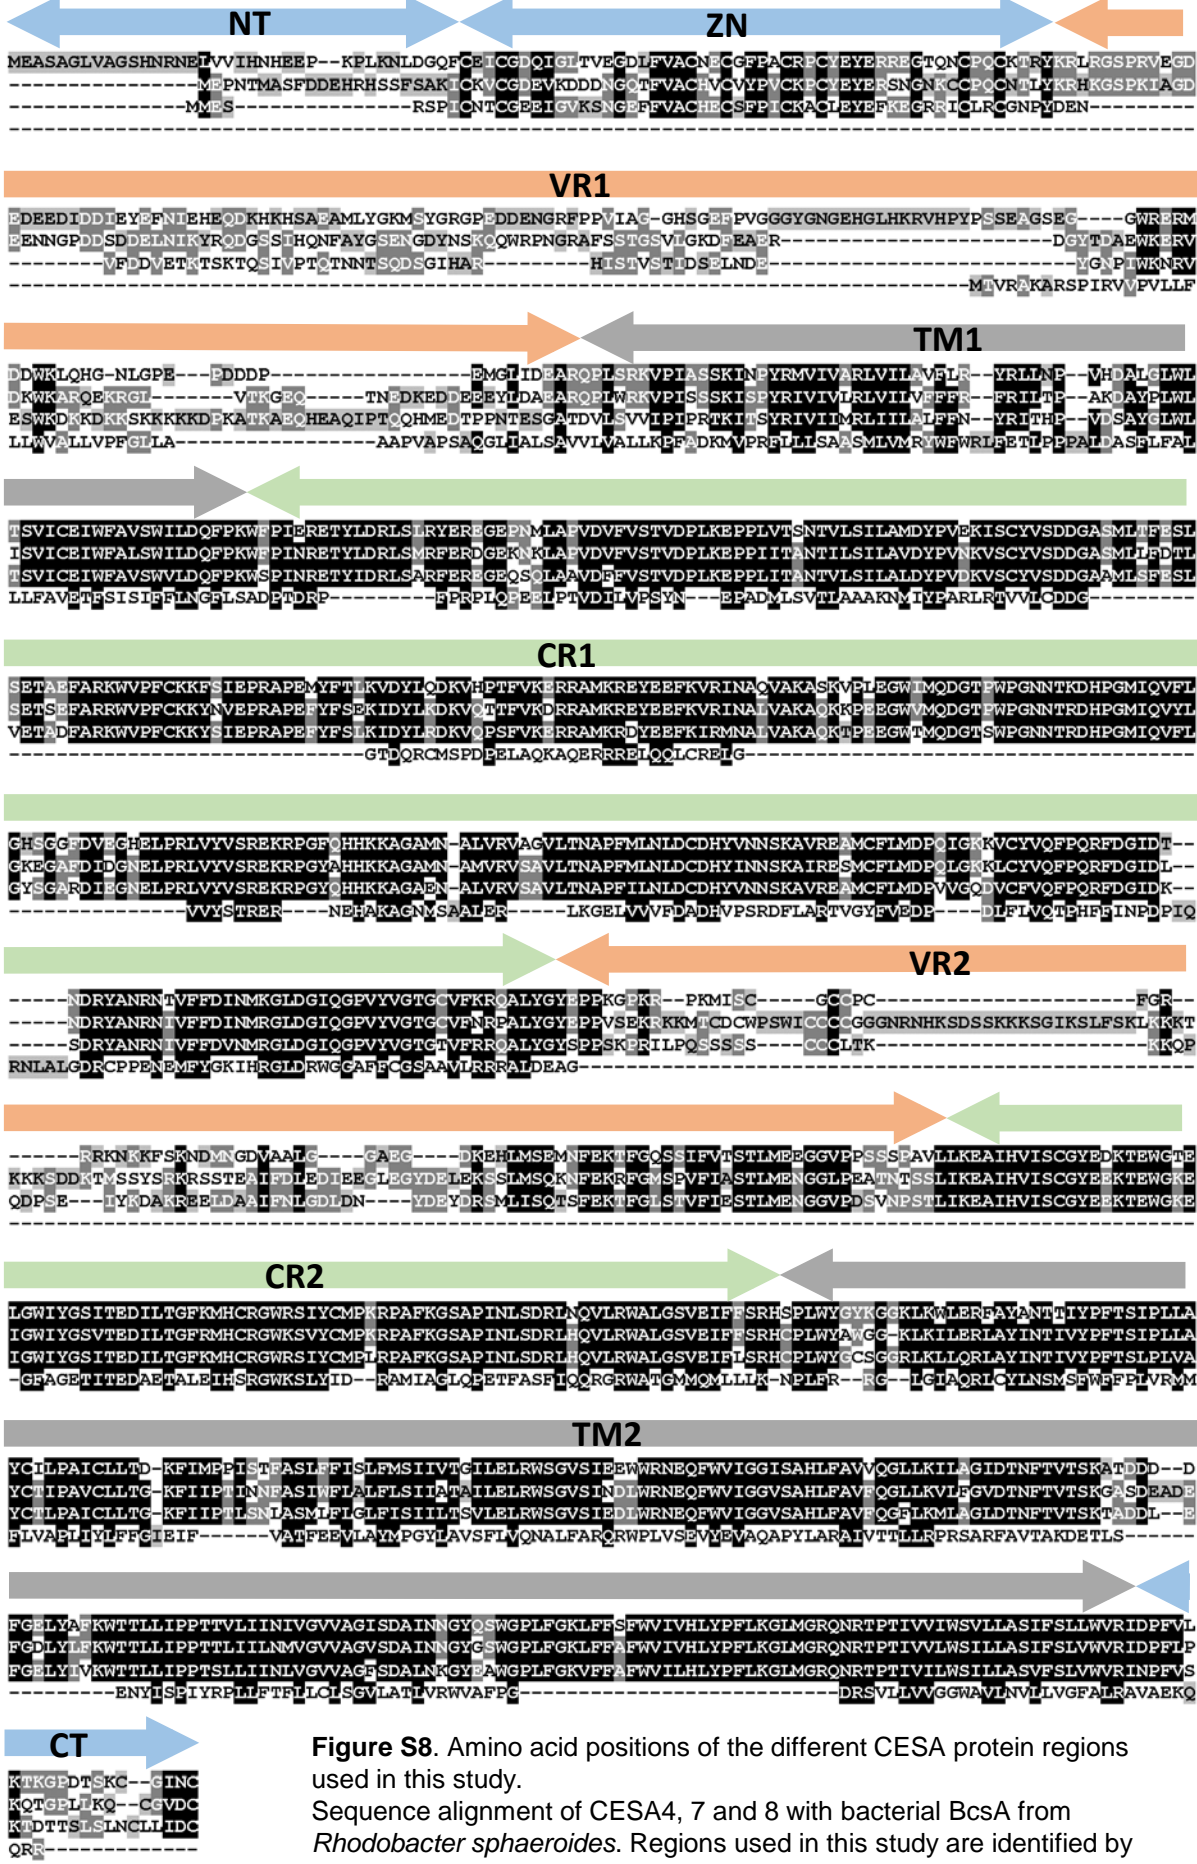

**Figure S8.** Amino acid positions of the different CESA protein regions used in this study. Sequence alignment of CESA4, 7 and 8 with bacterial BcsA from *Rhodobacter sphaeroides*. Regions used in this study are identified by the double headed arrows above the alignment.



# Single region swaps

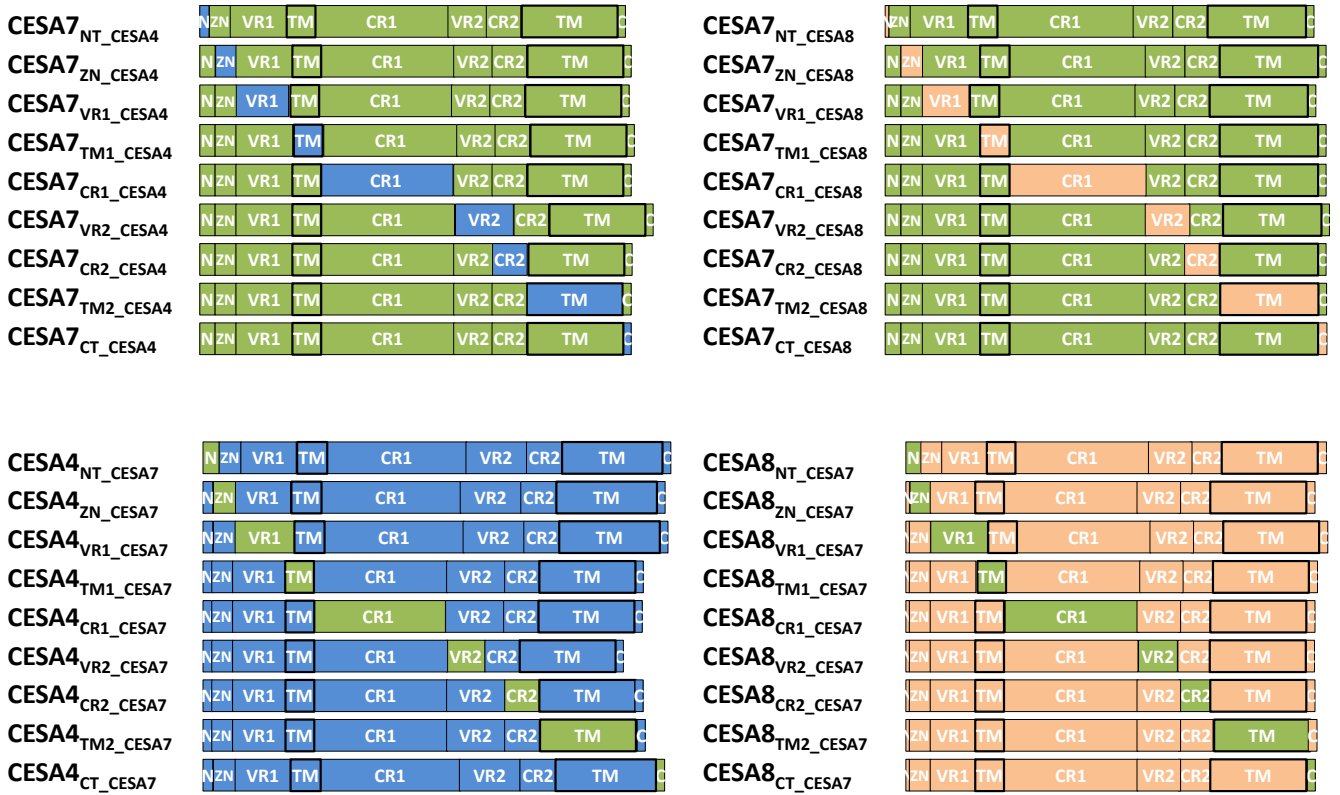

# Multi-region swaps

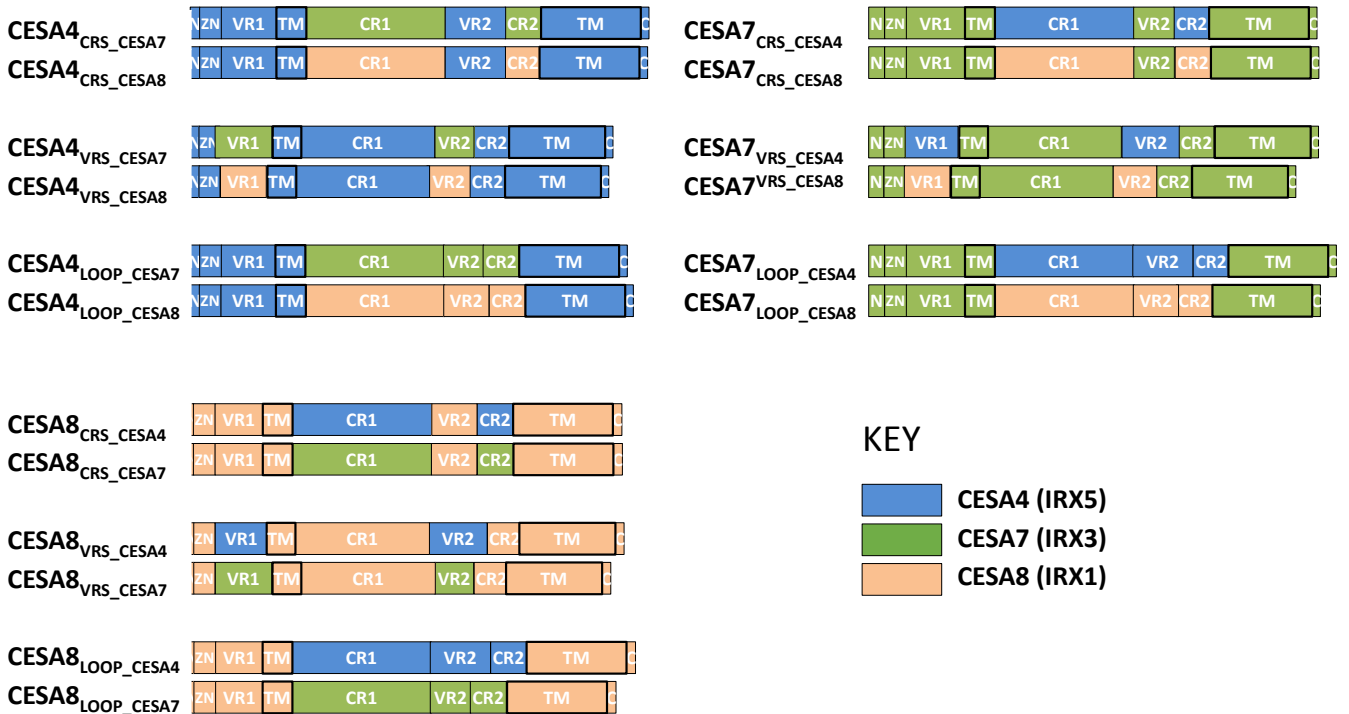

## KEY

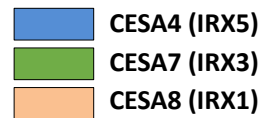

**Figure S9.** Schematic representation of the swap constructs used in this study. All region lengths are proportional to their respective amino acid size.

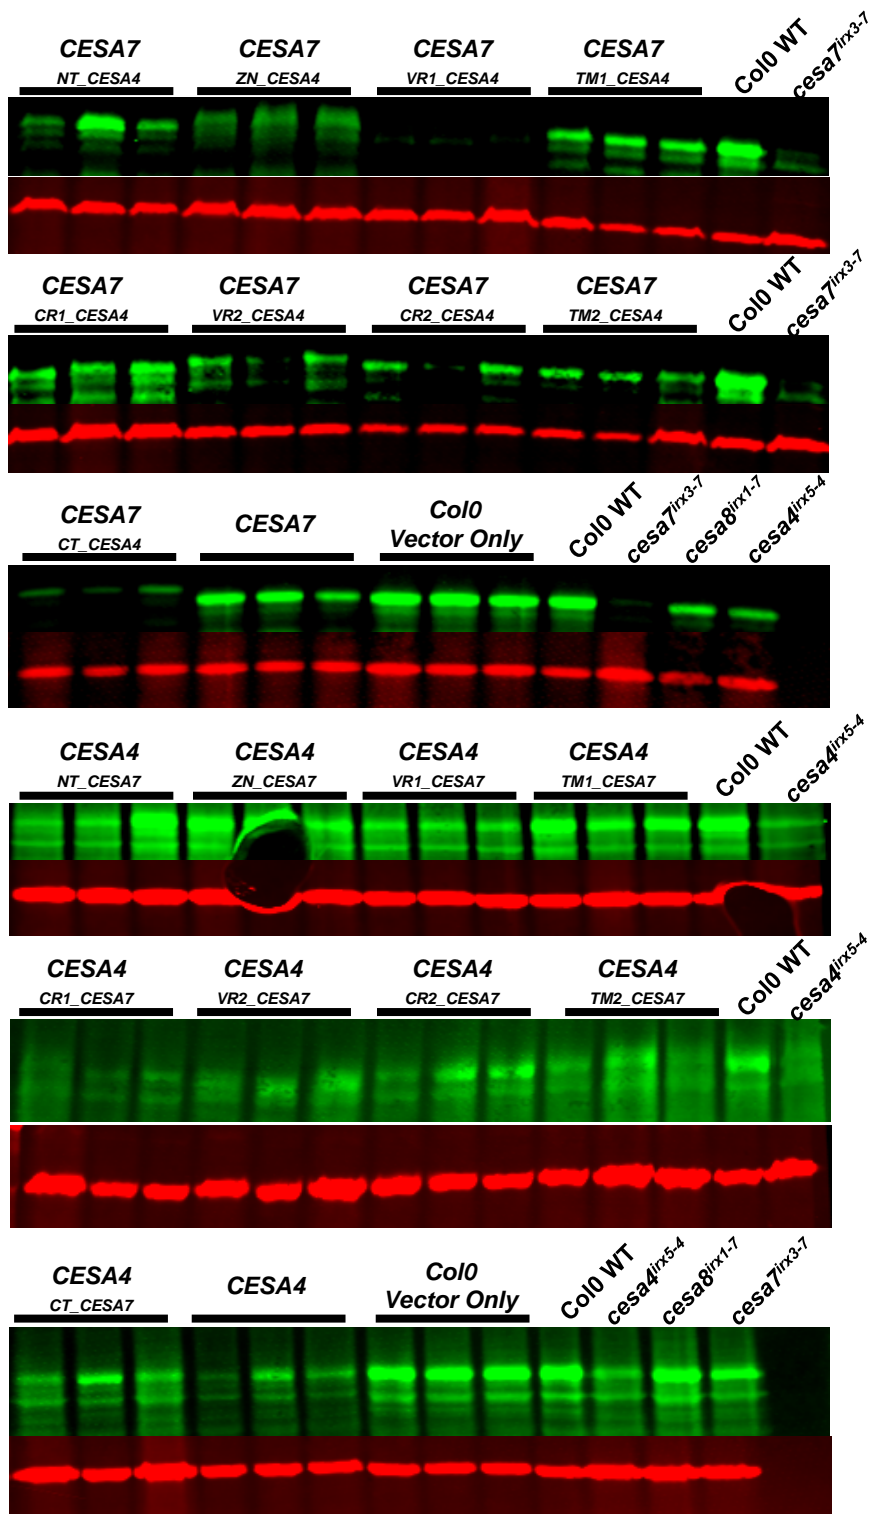

**Figure S10.** Analysis of protein expression in the swap constructs used in this study. Level of expression was measured for CESA7 (A) or CESA4 (B) using quantitative western blot analysis. Crudes extracts prepared from 3 independent lines for each CESA7<sub>CESA4</sub> construct and probed with anti-CESA7 antibody while the crude extracts prepared from three independent lines for each CESA4<sub>CESA7</sub> construct were probed with anti-CESA4 antibody (green bands). All extracts were also simultaneously probed with anti-HSP73 antibody to normalise for loading variations (red bands). HSP73 normalised signals were then expressed as percentage of Col0 WT. Protein expression (%WT) was plotted against cellulose content (%WT) to produce Figure 7.

| Region       | AtCesA04     |        | AtCesA07     |        | AtCesA08    |        |
|--------------|--------------|--------|--------------|--------|-------------|--------|
|              | coordinates  | length | coordinates  | length | coordinates | length |
| <b>NT</b>    | aa 1-22      | 22     | aa 1-36      | 36     | aa 1-8      | 8      |
| <b>Zn</b>    | aa 23-72     | 50     | aa 37-86     | 50     | aa 9-58     | 50     |
| <b>VR1</b>   | aa 73-197    | 125    | aa 87-220    | 134    | aa 59-166   | 108    |
| <b>TM1-2</b> | aa 198-265   | 68     | aa 221-288   | 68     | aa 167-234  | 68     |
| <b>CR1</b>   | aa 266-583   | 318    | aa 289-606   | 318    | aa 235-552  | 318    |
| <b>VR2</b>   | aa 584-720   | 137    | aa 607-698   | 92     | aa 553-655  | 103    |
| <b>CR2</b>   | aa 721-802   | 82     | aa 699-780   | 82     | aa 656-737  | 82     |
| <b>TM3-8</b> | aa 803-1030  | 228    | aa 781-1007  | 227    | aa 738-964  | 227    |
| <b>CT</b>    | aa 1031-1049 | 19     | aa 1008-1026 | 19     | aa 965-985  | 21     |
| <b>CRS</b>   | CR1+CR2      | 400    | CR1+CR2      | 400    | CR1+CR2     | 400    |
| <b>VRS</b>   | VR1+VR2      | 262    | VR1+VR2      | 226    | VR1+VR2     | 211    |
| <b>LOOP</b>  | CR1+VR2+CR2  | 537    | CR1+VR2+CR2  | 492    | CR1+VR2+CR2 | 503    |
| <b>TOTAL</b> | 1049         |        | 1026         |        | 985         |        |

**Table S1.** Protein coordinates for regions of AtCESA4, 7 and 8 used in the swap constructs.

| Swap Name                   | Primer BF                            | Primer CF                            |
|-----------------------------|--------------------------------------|--------------------------------------|
| CESA7 <sup>NT</sup> _CESA4  | gtttccagtcacgacgttgtaaacgacggccag    | tcattctcggctaagatttgtgagatatgtggagat |
| CESA7 <sup>ZN</sup> _CESA4  | aatctagatggacaattctgcaaagtctgtggcgat | caatgcaacactctttacaagcgtctcagaggaagc |
| CESA7 <sup>VR1</sup> _CESA4 | cagtgaagactcgttacaaacgccacaaaggctct  | ctagatgctgaagcaagacagccactctcgcggaaa |
| CESA7 <sup>TM1</sup> _CESA4 | ctgatcgacgaggcacggcaacctctctggagaaaa | cttgatcagttcccgaatggttccctattgaacgt  |
| CESA7 <sup>CR1</sup> _CESA4 | cttgatcagttcccgaatggttccgattaaccga   | agaccagcattatacGGAtatgaaccaccaaagggt |
| CESA7 <sup>VR2</sup> _CESA4 | cgacaagctctgtatGGAtacgaacctcggatcgc  | tcggtgatcaaagaagctatccatgtcataagctgc |
| CESA7 <sup>CR2</sup> _CESA4 | gtgctcctaaagaggcaattcatgttattagctgt  | atcttcttagtcgcatagtcctctctggtatggc   |
| CESA7 <sup>TM3</sup> _CESA4 | atattttcagccggcactgtcctttggtatgct    | ttggtttgggtcggattgatcctttgtgctcaag   |
| CESA7 <sup>CT</sup> _CESA4  | ttgctttgggtaagaattgatccgttcttgccgaaa | -                                    |
|                             |                                      |                                      |
| CESA7 <sup>NT</sup> _CESA8  | gtttccagtcacgacgttgtaaacgacggccag    | gagtctaggctcccatctgtgagatatgtggagat  |
| CESA7 <sup>ZN</sup> _CESA8  | aatctagatggacaattctgcaacacttgggtgaa  | cgttgaggcaatccttacaagcgtctcagaggaagc |
| CESA7 <sup>VR1</sup> _CESA8 | cagtgaagactcgttacgatgagaatgtgttgat   | acagaatctgggtctacacagccactctcgcggaaa |
| CESA7 <sup>TM1</sup> _CESA8 | ctgatcgacgaggcacgggatgtgcttccggttg   | ttgatcagttccctaatggttccctattgaacgt   |
| CESA7 <sup>CR1</sup> _CESA8 | cttgatcagttcccgaatgggtctctattaaccga  | agacaagcactttacggatatgaaccaccaaagggt |
| CESA7 <sup>VR2</sup> _CESA8 | cgacaagctctgtatGGTtacagtcaccttcaaaa  | acgctcatcaaagaagctatccatgtcataagctgc |
| CESA7 <sup>CR2</sup> _CESA8 | gtgctcctaaagaggcaattcatgtcattagctgt  | atcttccttagccgacatagtcctctctggtatggc |
| CESA7 <sup>TM3</sup> _CESA8 | atattttcagccggcactgtcctttggtacggt    | cttgtttgggtcgtatcgcctttgtgctcaag     |
| CESA7 <sup>CT</sup> _CESA8  | ttgctttgggtaagaattaatcctttcgtctcaaaa | -                                    |
|                             |                                      |                                      |
| CESA4 <sup>NT</sup> _CESA7  | gtttccagtcacgacgttgtaaacgacggccag    | aatctagatggacaattctgcaaagtctgtggcgat |
| CESA4 <sup>ZN</sup> _CESA7  | tcattctcggctaagatttgtgagatatgtggagat | cagtgaagactcgttacaaacgccacaaaggctct  |
| CESA4 <sup>VR1</sup> _CESA7 | caatgcaacactctttacaagcgtctcagaggaagc | ctgatcgacgaggcacggcaacctctctggagaaaa |
| CESA4 <sup>TM1</sup> _CESA7 | ctagatgctgaagcaagacagccactctcgcggaaa | cttgatcagttcccgaatggttccgattaaccga   |
| CESA4 <sup>CR1</sup> _CESA7 | cttgatcagttcccgaatggttccctattgaacgt  | cgacaagctctgtatGGAtacgaacctcggatcgc  |
| CESA4 <sup>VR2</sup> _CESA7 | agaccagcattatacGGAtatgaaccaccaaagggt | gtgctcctaaagaggcaattcatgttattagctgt  |
| CESA4 <sup>CR2</sup> _CESA7 | tcggtgatcaaagaagctatccatgtcataagctgc | atattttcagccggcactgtcctttggtatgct    |
| CESA4 <sup>TM3</sup> _CESA7 | atcttcttagtcgcatagtcctctctggtatggc   | ttgctttgggtaagaattgatccgttcttgccgaaa |
| CESA4 <sup>CT</sup> _CESA7  | ttggtttgggtcggattgatcctttgtgctcaag   | -                                    |
|                             |                                      |                                      |
| CESA8 <sup>NT</sup> _CESA7  | gtttccagtcacgacgttgtaaacgacggccag    | aatctagatggacaattctgcaacacttgggtgaa  |
| CESA8 <sup>ZN</sup> _CESA7  | gagtctaggctcccatctgtgagatatgtggagat  | cagtgaagactcgttacgatgagaatgtgttgat   |
| CESA8 <sup>VR1</sup> _CESA7 | cgttgaggcaatccttacaagcgtctcagaggaagc | ctgatcgacgaggcacgggatgtgcttccggttg   |
| CESA8 <sup>TM1</sup> _CESA7 | acagaatctgggtctacacagccactctcgcggaaa | cttgatcagttcccgaatgggtctctattaaccga  |
| CESA8 <sup>CR1</sup> _CESA7 | ttgatcagttccctaatggttccctattgaacgt   | cgacaagctctgtatGGTtacagtcaccttcaaaa  |
| CESA8 <sup>VR2</sup> _CESA7 | agacaagcactttacggatatgaaccaccaaagggt | gtgctcctaaagaggcaattcatgtcattagctgt  |
| CESA8 <sup>CR2</sup> _CESA7 | acgctcatcaaagaagctatccatgtcataagctgc | atattttcagccggcactgtcctttggtacggt    |
| CESA8 <sup>TM3</sup> _CESA7 | atcttccttagccgacatagtcctctctggtatggc | ttgctttgggtaagaattaatcctttcgtctcaaaa |

|                             |                                      |                                      |
|-----------------------------|--------------------------------------|--------------------------------------|
| CESA8 <sup>CT_CESA7</sup>   | cttgttgggttcgatcgcacctttgtgctcaag    | -                                    |
|                             |                                      |                                      |
|                             |                                      |                                      |
| CESA4 <sup>CRS_CESA7</sup>  | cgacaagctctgtatGGAtacgaacctccggtatcg | tcaactttgatggaagaaggaggattgccggaggcg |
| CESA4 <sup>CRS_CESA8</sup>  | agacaagcactttacggatacgaacctccggtatcg | tctactcttatggagaatggaggattgccggaggcg |
| CESA4 <sup>VRS_CESA7</sup>  | agaccagcattatacGGAtatgaaccaccaaagggt | tcaactttgatggaagaaggaggattgccggaggcg |
| CESA4 <sup>VRS_CESA8</sup>  | agaccagcattatacGGAtacagtcaccttcaaaa  | tctactcttatggagaatggaggattgccggaggcg |
| CESA4 <sup>LOOP_CESA7</sup> | cttgatcagttcccgaatggttcctattgaacgt   | atattttcagccggcactgtcctttgtggtatgct  |
| CESA4 <sup>LOOP_CESA8</sup> | cttgatcagttcccgaatggttcctattaaccga   | atcttccttagccgacattgtcctttgtggtatgct |
|                             |                                      |                                      |
|                             |                                      |                                      |
| CESA7 <sup>CRS_CESA4</sup>  | agaccagcattatacGGAtatgaaccaccaaagggt | tgcagcttgatggagaacgggtggttctcctcgta  |
| CESA7 <sup>CRS_CESA8</sup>  | agacaagcactttacggatatgaaccaccaaagggt | tctactcttatggagaatggtggttctcctcgta   |
| CESA7 <sup>VRS_CESA4</sup>  | cgacaagctctgtatGGAtacgaacctccggtatcg | tgcagcttgatggagaacgggtggttctcctcgta  |
| CESA7 <sup>VRS_CESA8</sup>  | cgacaagctctgtatGGTtacagtcaccttcaaaa  | tctactcttatggagaatggtggttctcctcgta   |
| CESA7 <sup>LOOP_CESA4</sup> | cttgatcagttcccgaatggttcctattaaccga   | atcttcttagtctcatagtcctctctggtatggc   |
| CESA7 <sup>LOOP_CESA8</sup> | cttgatcagttcccgaatggttcctattaaccga   | atcttccttagccgacatagtcctctctggtatggc |
|                             |                                      |                                      |
|                             |                                      |                                      |
| CESA8 <sup>CRS_CESA4</sup>  | agaccagcattatacGGAtacagtcaccttcaaaa  | tgcagcttgatggagaacggcggttcccgactct   |
| CESA8 <sup>CRS_CESA7</sup>  | cgacaagctctgtatGGTtacagtcaccttcaaaa  | tcaactttgatggaagaaggcggttcccgactct   |
| CESA8 <sup>VRS_CESA4</sup>  | agacaagcactttacggatacgaacctccggtatcg | tgcagcttgatggagaacggcggttcccgactct   |
| CESA8 <sup>VRS_CESA7</sup>  | agacaagcactttacggatatgaaccaccaaagggt | tcaactttgatggaagaaggcggttcccgactct   |
| CESA8 <sup>LOOP_CESA4</sup> | ttgatcagttccctaaatggttcctattaaccga   | atcttcttagtctcattgtcctttgtggtacggt   |
| CESA8 <sup>LOOP_CESA7</sup> | ttgatcagttccctaaatggttcctattgaacgt   | atattttcagccggcactgtcctttgtggtacggt  |
|                             |                                      |                                      |
| CESA8 <sup>VR1_CESA4</sup>  | cgttgaggcaatccttacaacgccacaaaggctct  | ctagatgctgaagcaagagatgtgctttcggttg   |
| CESA4 <sup>VR1_CESA8</sup>  | caatgcaacactctttacgatgagaatgtttgat   | acagaatctggtgctacacaacctctctggagaaaa |
|                             |                                      |                                      |

**Table S2.** List of primers used in this study.

For each swap, upto 6 primers were used. Two general primers, MF (GTTTTCCAGTCACGACGTTGTAACGACGGCCAG) and MR (CAGAAACAGCTATGACCATGTAATACGACTACTA) were used in all swaps. Either 2 or 4 swap specific primers were used for each swap. Primer BF and CR have complementary sequences BR and CR respectively. Here we have listed sequence for BF and CF primers only.
